# Supplementary material for: The Composition of Saturated Vapor over 1-Butyl-3-methylimidazolium Tetrafluoroborate Ionic Liquid: A Multi-Technique Study of the Vaporization Process
Source: MDPI journal article supplement (doi:10.3390/e23111478), 2021-11-08
Supplement: s1 [file s1]

Supplementary materials to

To the question of the composition of saturated vapor over 1-butyl-3-methylimidazolium tetrafluoroborate ionic liquid: a multi-technique study of the vaporization process

A.M. Dunaev<sup>1</sup>, V.B. Motalov, Ya.A. Radchenko, L.S. Kudin

Research Institute of Thermodynamics and Kinetics, Ivanovo State University of Chemistry and Technology, Ivanovo 153000, Russia

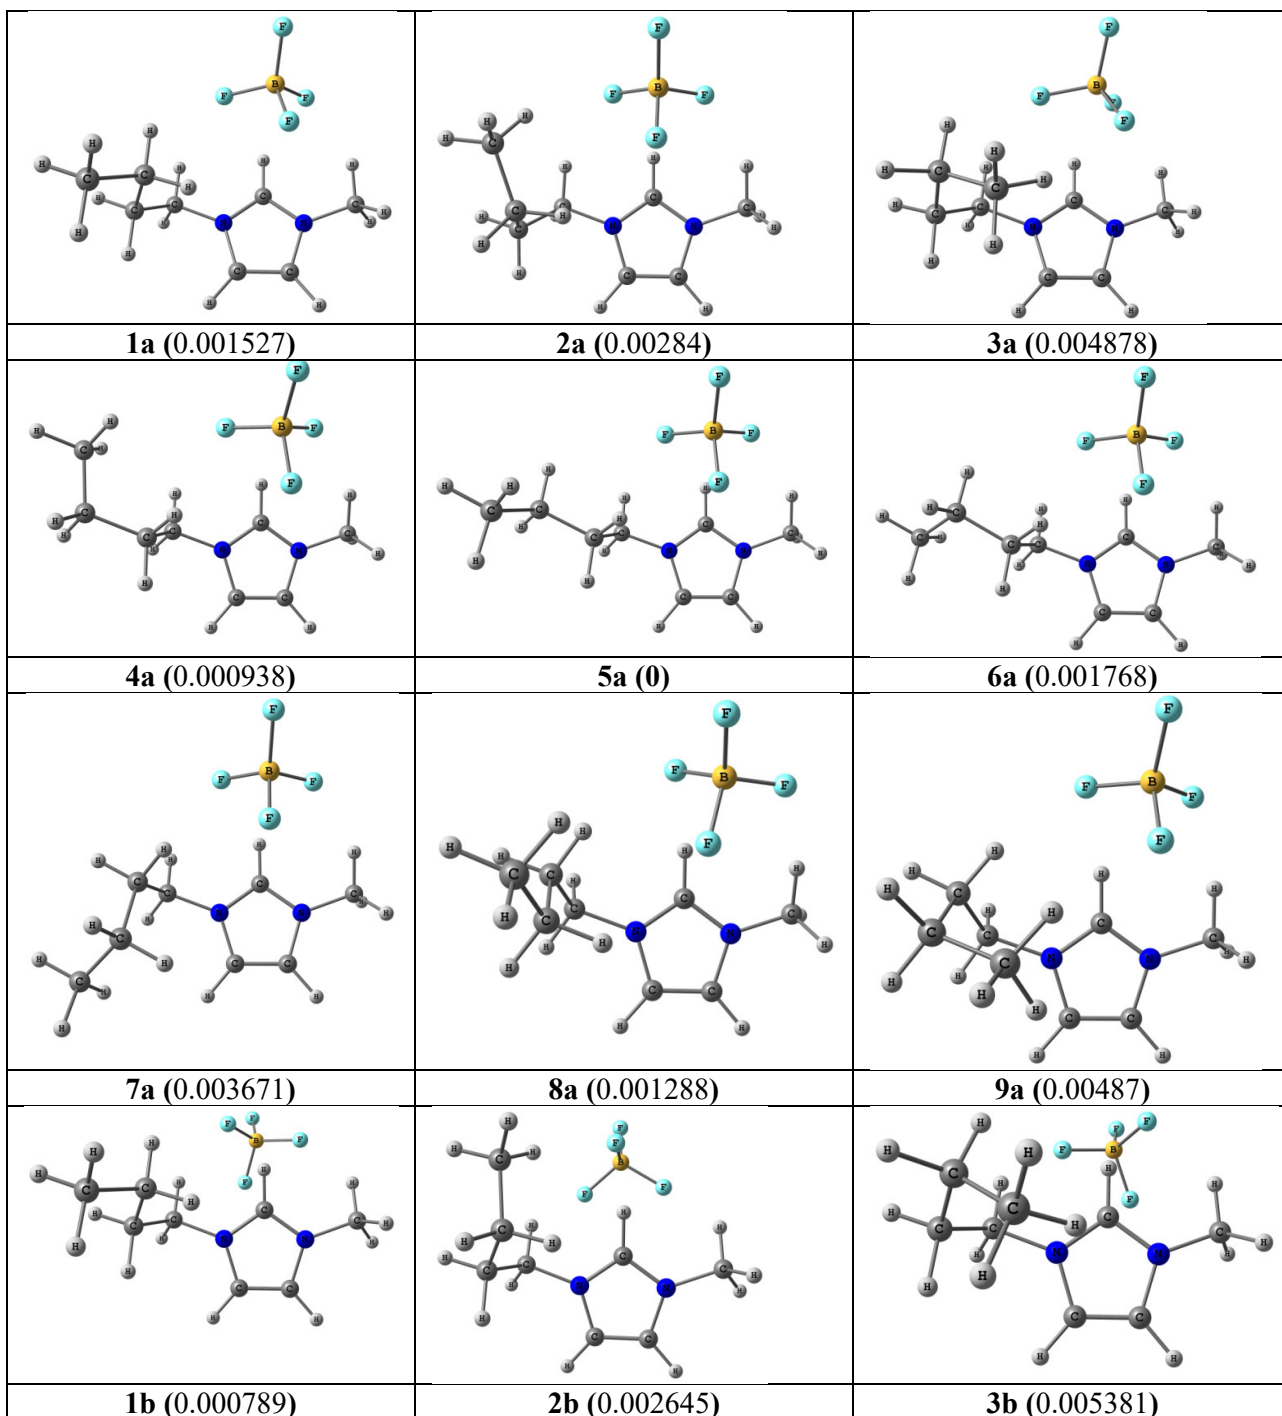

<sup>1</sup> - corresponding author: amdunaev@ro.ru

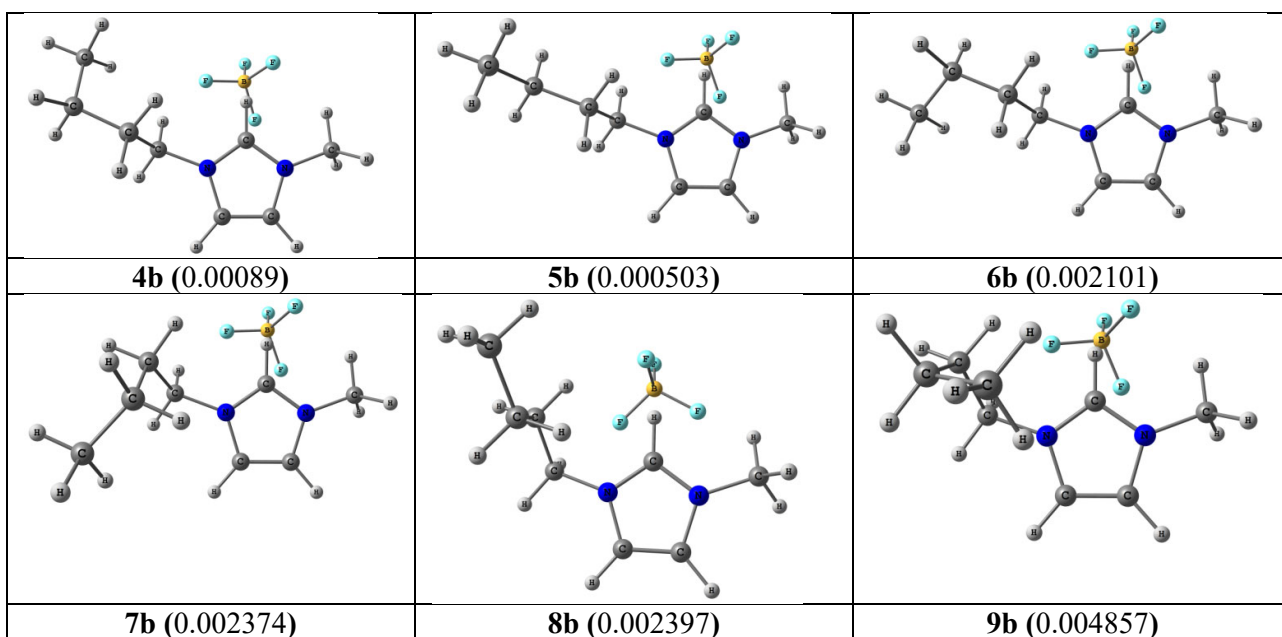

Figure S1. Structures of BMImBF<sub>4</sub> conformers. Relative energies (hartree) are given in parentheses

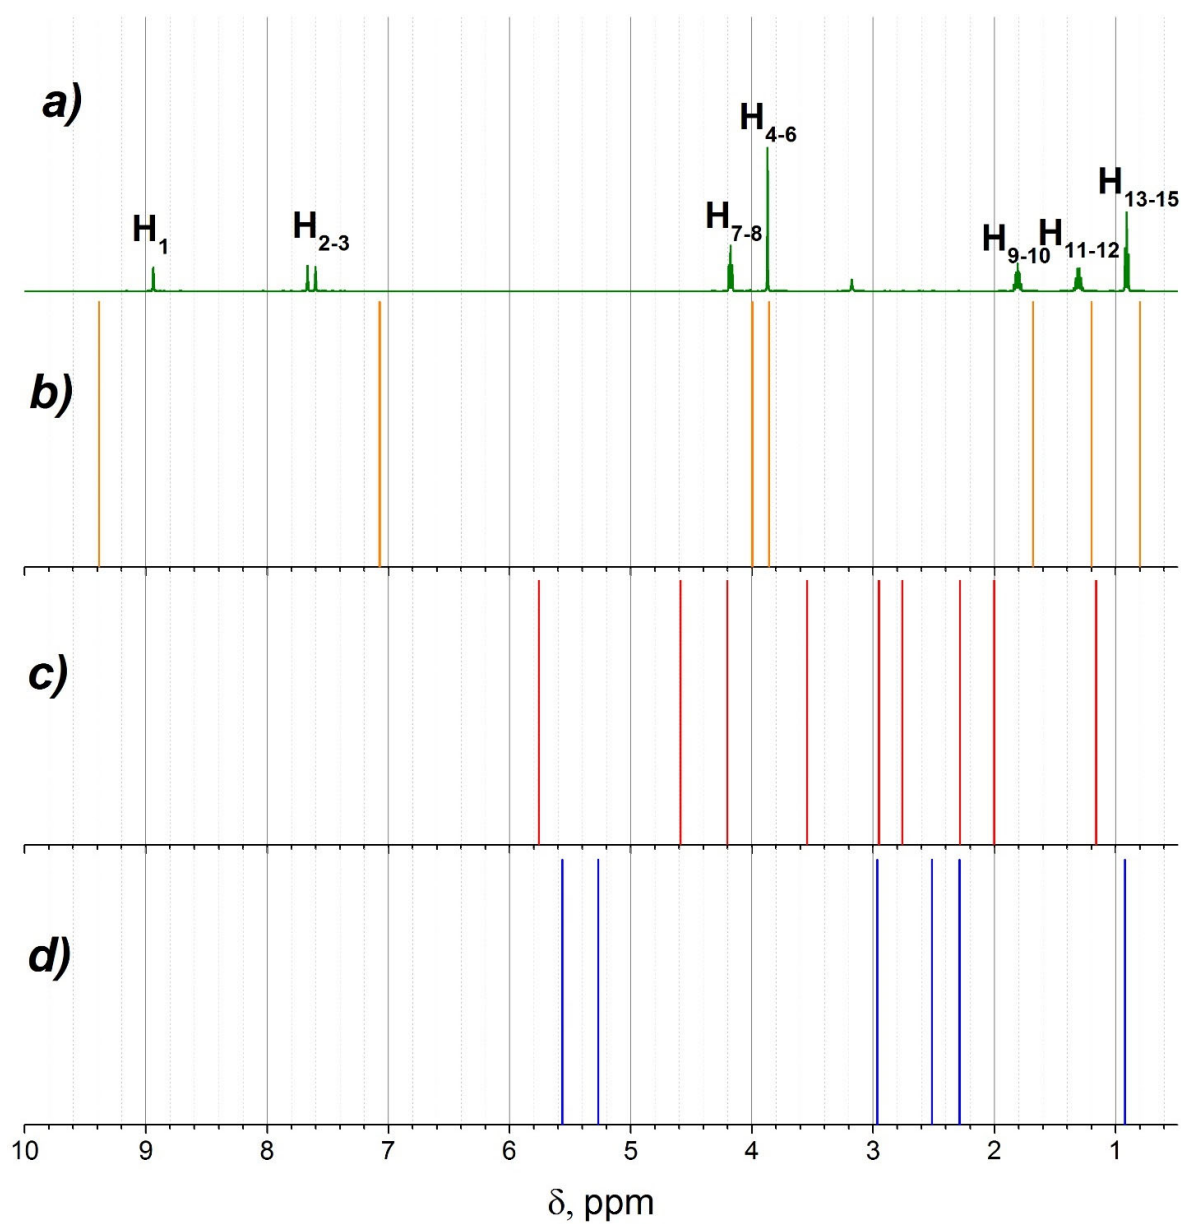

Fig. S2. Experimental (*a*, line) and theoretically predicted (*b-d*, bar) NMR spectra:  
*a*, *b* – BMImBF<sub>4</sub>; *c* – imidazole-2-ylidene; *d* – bicyclic IL (see text)
